# Supplementary material for: Optimal design of decentralized ammonia production via electric Haber–Bosch systems
Source: Royal Society of Chemistry journal article supplement (doi:10.1039/d5gc06782k), 2026-01-01
Supplement: d5gc06782k1.xlsx [file d5gc06782k1.xlsx]

## Sheet: Fig_3a
				curtailment	PV panels	wind turbines	grid import
Brazil_Guarapuava	autonomous	2025	low	-2.98711	34.7756	40.8715	0
Brazil_Guarapuava	hybrid	2025	low	-1.29911	32.5328	31.7467	0.652746
Brazil_Guarapuava	grid	2025	low	0	0	0	14.0844
India_Lucknow	autonomous	2025	low	-3.87326	35.0184	45.661	0
India_Lucknow	hybrid	2025	low	-2.48063	34.8011	35.6822	0.841252
India_Lucknow	grid	2025	low	0	0	0	14.0844
China_Shangqiu	autonomous	2025	low	-2.74038	17.1153	38.8912	0
China_Shangqiu	hybrid	2025	low	-1.60273	9.25682	38.5522	0.434847
China_Shangqiu	grid	2025	low	0	0	0	14.0844
Italy_Bologna	autonomous	2025	low	-2.622	27.6466	44.053	0
Italy_Bologna	hybrid	2025	low	-2.49617	27.0016	43.827	0.0155138
Italy_Bologna	grid	2025	low	0	0	0	14.0844
Ethiopia_Addisababa	autonomous	2025	low	-5.51443	52.0638	34.4412	0
Ethiopia_Addisababa	hybrid	2025	low	0	0	0	14.0844
Ethiopia_Addisababa	grid	2025	low	0	0	0	14.0844
USA_Omaha	autonomous	2025	low	-4.72007	16.0882	29.8933	0
USA_Omaha	hybrid	2025	low	-3.08523	3.47874	31.3673	0.509308
USA_Omaha	grid	2025	low	0	0	0	14.0844

## Sheet: Fig_3b
				battery	hydrogen storage
Brazil_Guarapuava	autonomous	2025	low	12.3126	603.626
Brazil_Guarapuava	hybrid	2025	low	0	78.2561
Brazil_Guarapuava	grid	2025	low	0	0
India_Lucknow	autonomous	2025	low	10.6511	1553.41
India_Lucknow	hybrid	2025	low	0	110.735
India_Lucknow	grid	2025	low	0	0
China_Shangqiu	autonomous	2025	low	4.35282	548.712
China_Shangqiu	hybrid	2025	low	0	207.914
China_Shangqiu	grid	2025	low	0	0
Italy_Bologna	autonomous	2025	low	3.33984	786.577
Italy_Bologna	hybrid	2025	low	0	729.712
Italy_Bologna	grid	2025	low	0	0
Ethiopia_Addisababa	autonomous	2025	low	17.378	1069.26
Ethiopia_Addisababa	hybrid	2025	low	0	0
Ethiopia_Addisababa	grid	2025	low	0	0
USA_Omaha	autonomous	2025	low	3.41288	473.573
USA_Omaha	hybrid	2025	low	0	160.479
USA_Omaha	grid	2025	low	0	0

## Sheet: Fig_3c
				ann. CapEx - PV panels	O&M - PV panels	ann. CapEx - wind turbines	O&M - wind turbines	cost grid import
Brazil_Guarapuava	autonomous	2025	low	3.82	0.72	4.76	1.23	0
Brazil_Guarapuava	hybrid	2025	low	3.58	0.67	3.7	0.96	0.73
Brazil_Guarapuava	grid	2025	low	0	0	0	0	15.79
India_Lucknow	autonomous	2025	low	3.75	0.72	5.18	1.38	0
India_Lucknow	hybrid	2025	low	3.73	0.72	4.05	1.08	0.93
India_Lucknow	grid	2025	low	0	0	0	0	15.55
China_Shangqiu	autonomous	2025	low	1.6	0.35	3.86	1.17	0
China_Shangqiu	hybrid	2025	low	0.87	0.19	3.83	1.16	0.36
China_Shangqiu	grid	2025	low	0	0	0	0	11.6
Italy_Bologna	autonomous	2025	low	2.95	0.57	4.99	1.33	0
Italy_Bologna	hybrid	2025	low	2.88	0.56	4.96	1.32	0.06
Italy_Bologna	grid	2025	low	0	0	0	0	54.53
Ethiopia_Addisababa	autonomous	2025	low	9.16	1.07	6.43	1.04	0
Ethiopia_Addisababa	hybrid	2025	low	0	0	0	0	2.34
Ethiopia_Addisababa	grid	2025	low	0	0	0	0	2.34
USA_Omaha	autonomous	2025	low	1.41	0.33	2.78	0.9	0
USA_Omaha	hybrid	2025	low	0.3	0.07	2.91	0.95	0.66
USA_Omaha	grid	2025	low	0	0	0	0	18.26

## Sheet: Fig_3d
				ann. CapEx - battery	O&M - PV panels	ann. CapEx - H$_2$ storage	O&M - wind turbines
Brazil_Guarapuava	autonomous	2025	low	0.646153	0.214045	0.871354	0.230917
Brazil_Guarapuava	hybrid	2025	low	0	0	0.112965	0.0299368
Brazil_Guarapuava	grid	2025	low	0	0	0	0
India_Lucknow	autonomous	2025	low	0.544422	0.185162	2.18407	0.594256
India_Lucknow	hybrid	2025	low	0	0	0.155691	0.0423615
India_Lucknow	grid	2025	low	0	0	0	0
China_Shangqiu	autonomous	2025	low	0.194661	0.0756707	0.674983	0.20991
China_Shangqiu	hybrid	2025	low	0	0	0.255759	0.0795372
China_Shangqiu	grid	2025	low	0	0	0	0
Italy_Bologna	autonomous	2025	low	0.17035	0.0580608	1.10356	0.300904
Italy_Bologna	hybrid	2025	low	0	0	1.02378	0.279151
Italy_Bologna	grid	2025	low	0	0	0	0
Ethiopia_Addisababa	autonomous	2025	low	1.46028	0.302104	2.4715	0.409044
Ethiopia_Addisababa	hybrid	2025	low	0	0	0	0
Ethiopia_Addisababa	grid	2025	low	0	0	0	0
USA_Omaha	autonomous	2025	low	0.142795	0.0593306	0.545029	0.181165
USA_Omaha	hybrid	2025	low	0	0	0.184693	0.0613911
USA_Omaha	grid	2025	low	0	0	0	0

## Sheet: Fig_4a
			LCOA-low	LCOA-high	LCOA-ref	LCOA-err_up	LCOA-err_down
Brazil_Guarapuava	autonomous	2025	1993.86	2604.26	2299.06	305.201	305.201
Brazil_Guarapuava	autonomous	2045	745.159	1030.55	887.856	142.697	142.697
India_Lucknow	autonomous	2025	2196.94	2775.76	2486.35	289.41	289.41
India_Lucknow	autonomous	2045	800.233	1120.32	960.277	160.045	160.045
China_Shangqiu	autonomous	2025	1363.03	1775.25	1569.14	206.111	206.111
China_Shangqiu	autonomous	2045	602.874	802.902	702.888	100.014	100.014
Italy_Bologna	autonomous	2025	1820.44	2324.47	2072.46	252.012	252.012
Italy_Bologna	autonomous	2045	769.132	1037.24	903.186	134.054	134.054
Ethiopia_Addisababa	autonomous	2025	3547.99	4596.24	4072.12	524.125	524.125
Ethiopia_Addisababa	autonomous	2045	1220.49	1726.36	1473.43	252.934	252.934
USA_Omaha	autonomous	2025	1113.86	1441.25	1277.55	163.694	163.694
USA_Omaha	autonomous	2045	496.868	653.415	575.141	78.2737	78.2737

## Sheet: Fig_4b
			LCOA-low	LCOA-high	LCOA-ref	LCOA-err_up	LCOA-err_down
Brazil_Guarapuava	hybrid	2025	1697.55	2236.33	1966.94	269.386	269.386
Brazil_Guarapuava	hybrid	2045	702.503	935.449	818.976	116.473	116.473
India_Lucknow	hybrid	2025	1766.41	2313.55	2039.98	273.572	273.572
India_Lucknow	hybrid	2045	742.672	1007	874.837	132.166	132.166
China_Shangqiu	hybrid	2025	1227.71	1622.4	1425.05	197.344	197.344
China_Shangqiu	hybrid	2045	592.854	762.771	677.813	84.9584	84.9584
Italy_Bologna	hybrid	2025	1783.39	2295.13	2039.26	255.872	255.872
Italy_Bologna	hybrid	2045	767.34	1034.24	900.79	133.45	133.45
Ethiopia_Addisababa	hybrid	2025	834.084	1084.25	959.169	125.085	125.085
Ethiopia_Addisababa	hybrid	2045	597.455	559.734	578.594	-18.8607	-18.8607
USA_Omaha	hybrid	2025	986.892	1303.24	1145.06	158.172	158.172
USA_Omaha	hybrid	2045	491.901	638.473	565.187	73.286	73.286

## Sheet: Fig_4c
			LCOA-low	LCOA-high	LCOA-ref	LCOA-err_up	LCOA-err_down
Brazil_Guarapuava	grid	2025	2188.95	2703.19	2446.07	257.119	257.119
Brazil_Guarapuava	grid	2045	1492.16	1557.8	1524.98	32.822	32.822
India_Lucknow	grid	2025	2152.98	2658.58	2405.78	252.8	252.8
India_Lucknow	grid	2045	1467.77	1532.32	1500.05	32.2748	32.2748
China_Shangqiu	grid	2025	1665.75	2063.28	1864.52	198.764	198.764
China_Shangqiu	grid	2045	1131.11	1181.59	1156.35	25.2372	25.2372
Italy_Bologna	grid	2025	6603.02	8052.45	7327.74	724.717	724.717
Italy_Bologna	grid	2045	4573.22	4762.69	4667.96	94.7369	94.7369
Ethiopia_Addisababa	grid	2025	834.084	1084.25	959.169	125.085	125.085
Ethiopia_Addisababa	grid	2045	530.169	559.734	544.951	14.7822	14.7822
USA_Omaha	grid	2025	2409.84	2963.07	2686.46	276.615	276.615
USA_Omaha	grid	2045	1651.87	1723.06	1687.46	35.5927	35.5927

## Sheet: Fig_5a
LCOA_ref	LCOA	LCOA-% variation to_ref	parameter	parameter value	parameter value_ref	params-% variation to ref
1086.2	1046.6	-3.6	storage_size_battery	5000	10000	-50
1086.2	1125.9	3.6	storage_size_battery	15000	10000	50
1086.2	1057.6	-2.6	storage_size_buffer	100000	300000	-66.7
1086.2	1114.8	2.6	storage_size_buffer	500000	300000	66.7
1086.2	896.7	-17.5	WACC	0	0.1	-34.1
1086.2	1574.2	44.9	WACC	0.1	0.1	77.1
1086.2	917.4	-15.5	capex_PV	602.7	895.3	-32.7
1086.2	1114	2.6	capex_PV	1540.6	895.3	72.1
1086.2	1020.9	-6	capex_wind	1093	1334	-18.1
1086.2	1086.2	0	capex_wind	1632	1334	22.3
1086.2	1057	-2.7	capex_battery	425	673.7	-36.9
1086.2	1134	4.4	capex_battery	1080	673.7	60.3
1086.2	1078.6	-0.7	capex_buffer	10.5	12.8	-17.8
1086.2	1110.9	2.3	capex_buffer	20.1	12.8	57.4
1086.2	993.3	-8.6	capex_electrolyzer	643.9	1592.2	-59.6
1086.2	1195.3	10	capex_electrolyzer	2705.2	1592.2	69.9
1086.2	1072.3	-1.3	capex_reactor	0	0	-11.9
1086.2	1101.7	1.4	capex_reactor	0	0	13.3
1086.2	989.2	-8.9	curtailment	0	20000000	-100
1086.2	1134.7	4.5	curtailment	30000000	20000000	50
1086.2	1114	2.6	capacity_factor_PV	0.2	0.2	-15.8
1086.2	1000.7	-7.9	capacity_factor_PV	0.3	0.2	15.8
1086.2	1086.2	0	capacity_factor_wind	0.2	0.3	-48.6
1086.2	899.7	-17.2	capacity_factor_wind	0.5	0.3	48.6

## Sheet: Fig_5b
LCOA_ref	LCOA	LCOA-pp_to_ref	parameter	value	value_ref	params-pp_to_ref
2327.86	2270.06	-2.4828	WACC	0.0433	0.0657167	-34.1111
2327.86	2476.63	6.39115	WACC	0.1164	0.0657167	77.124
2327.86	2327.86	0	capex_PV	602.678	895.321	-32.6858
2327.86	2327.86	0	capex_PV	1540.63	895.321	72.0755
2327.86	2327.86	0	capex_wind	1093	1334	-18.066
2327.86	2327.86	0	capex_wind	1632	1334	22.3388
2327.86	2327.86	0	capex_battery	425	673.698	-36.9154
2327.86	2327.86	0	capex_battery	1080	673.698	60.3092
2327.86	2327.86	0	capex_buffer	10.5105	12.7814	-17.767
2327.86	2327.86	0	capex_buffer	20.1201	12.7814	57.4175
2327.86	2294.32	-1.44072	capex_electrolyzer	1250	1592.25	-21.4947
2327.86	2343.32	0.664061	capex_electrolyzer	1750	1592.25	9.90743
2327.86	2313.96	-0.596987	capex_reactor	0.00673077	0.00763942	-11.8943
2327.86	2343.37	0.66648	capex_reactor	0.00865385	0.00763942	13.2788
2327.86	1585.01	-31.9112	elec_price	0.1	0.1595	-37.3041
2327.86	2833.49	21.7211	elec_price	0.2	0.1595	25.3918
